# Supplementary material for: Deep learning applications for the classification of psychiatric disorders using neuroimaging data: Systematic review and meta-analysis
Source: PubMed Central journal article supplement (PMC8209481; doi:10.1016/j.nicl.2021.102584), 2021-02-10
Supplement: mmc1.pdf [file mmc1.pdf]

Sites = 1

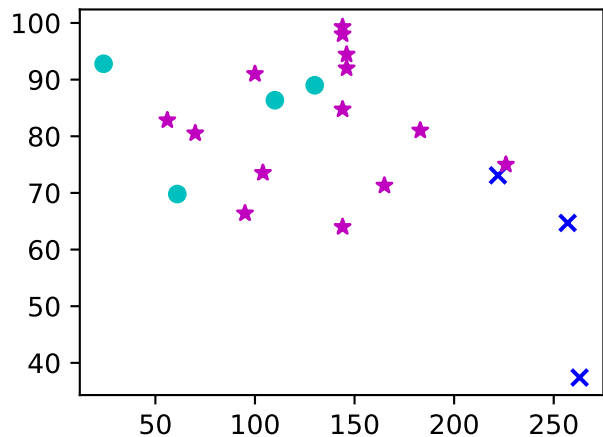

Sites = 2

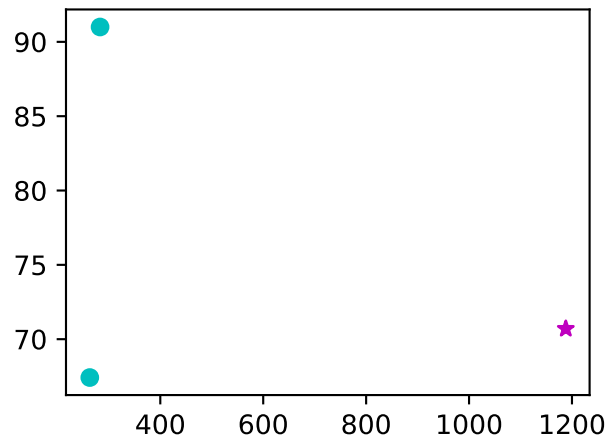

Sites = 3

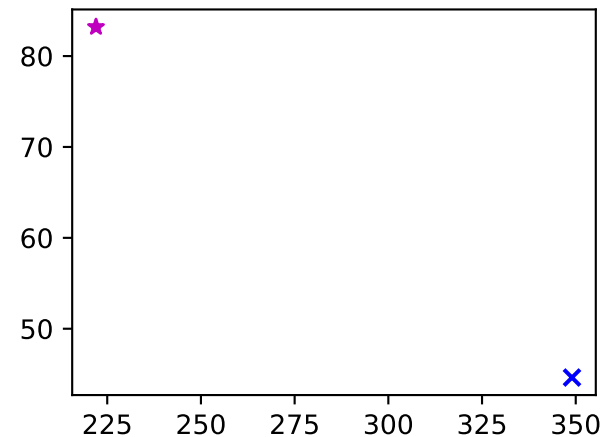

Sites = 4

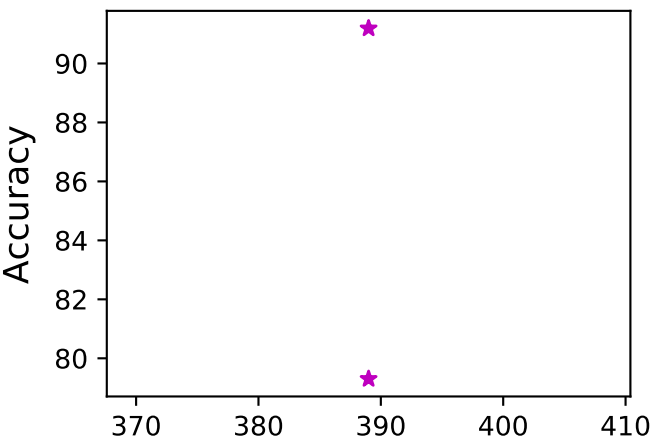

Sites = 7

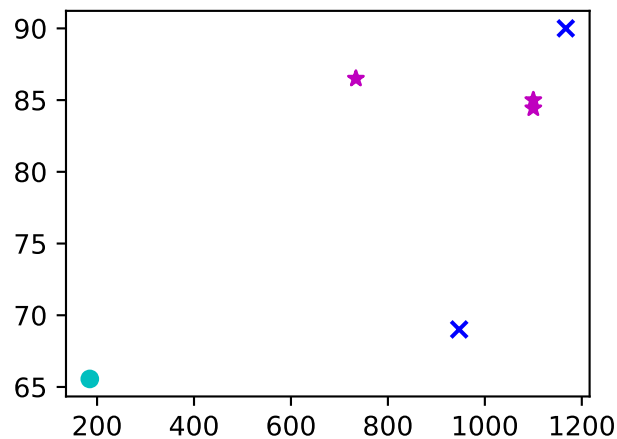

Sites = 8

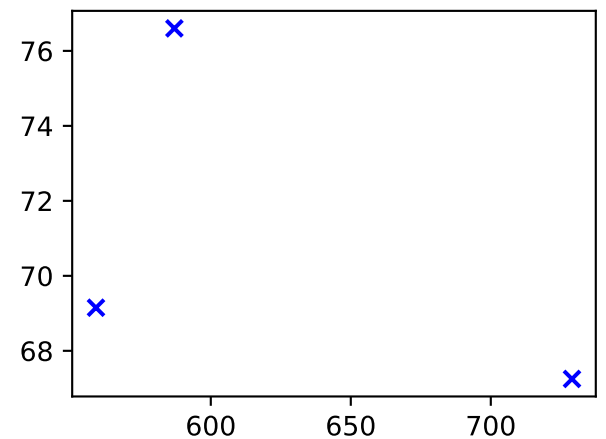

Sites = 17

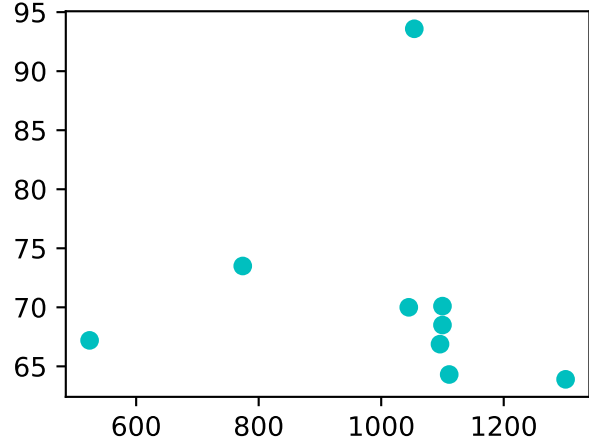

Sites = 20

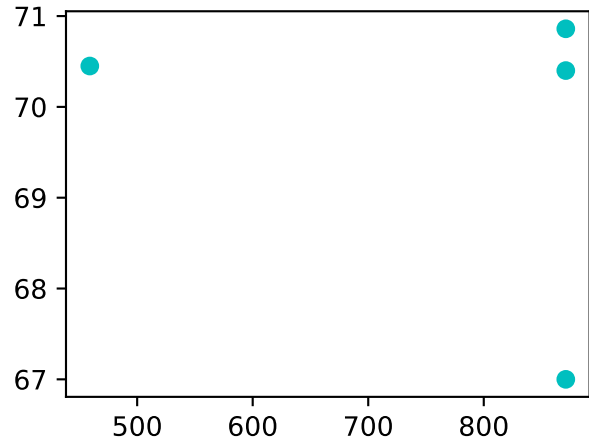

Disorder

✕ ADHD

● ASD

★ SZ
