# Supplementary material for: Deep learning applications for the classification of psychiatric disorders using neuroimaging data: Systematic review and meta-analysis
Source: PubMed Central journal article supplement (PMC8209481; doi:10.1016/j.nicl.2021.102584), 2021-02-10

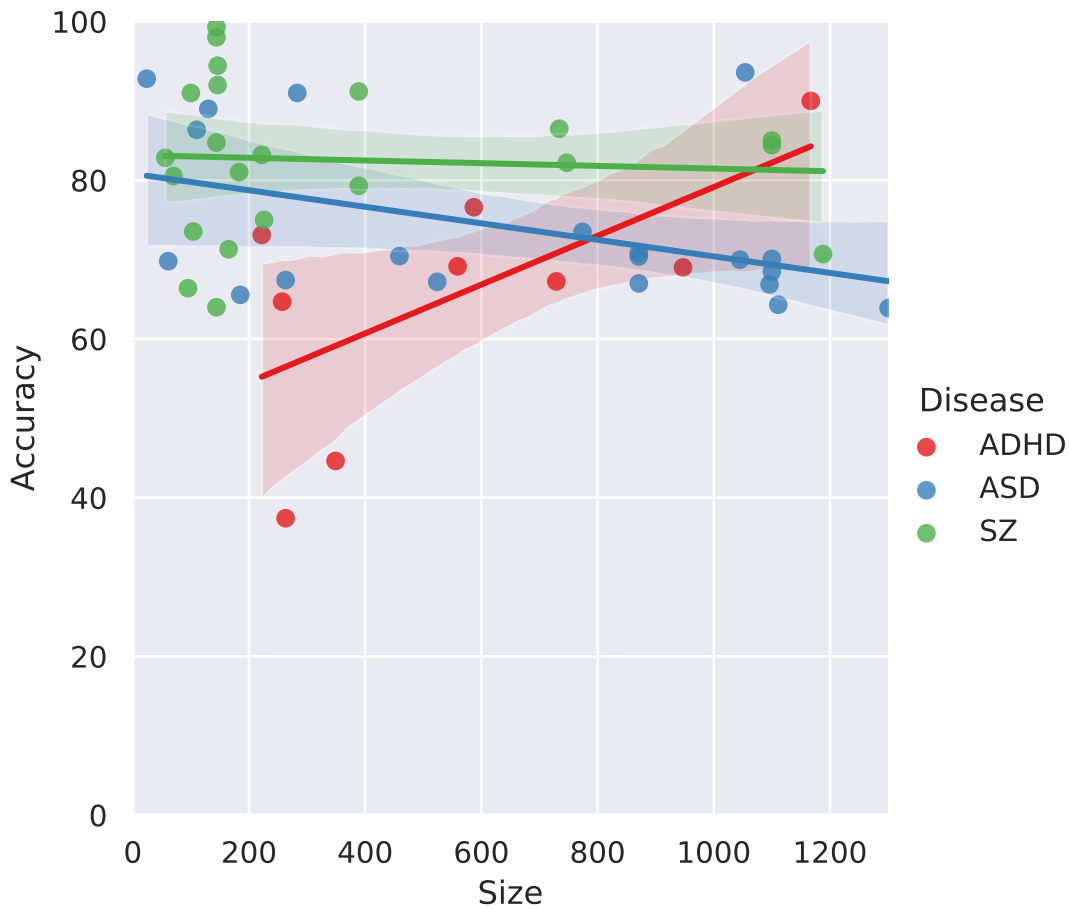

Supplement: mmc2.pdf [file mmc2.pdf]
